# Supplementary material for: The Ontology Lookup Service, a lightweight cross-platform tool for controlled vocabulary queries
Source: Springer Nature journal article supplement (doi:10.1186/1471-2105-7-97), 2006-02-28
Supplement: 12859_2005_836_MOESM1_ESM.pdf [file 12859_2005_836_MOESM1_ESM.pdf]

Interactive  
access

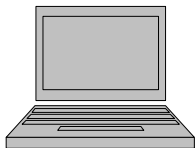

HTML

AJAX

Web App

Programmatic  
access

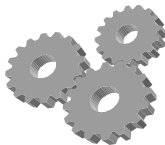

SOAP

OBO CVS  
Repository

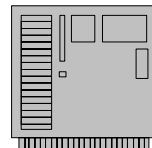

Loaders

Query Layer

Object Layer

ORM layer

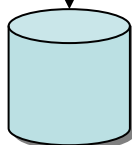

RDBMS

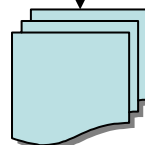

Text Indexes
